# Supplementary material for: Chronic Critical Illness Elicits a Unique Circulating Leukocyte Transcriptome in Sepsis Survivors
Source: MDPI journal article supplement (doi:10.3390/jcm10153211), 2021-07-21
Supplement: s1 [file s1]

**Table S1.** Characteristics of All Enrolled Sepsis Patients in Comparison to Selected Sepsis Cohort.

|                                                    | <b>Study Cohort<br/>(<i>n</i> = 118)</b> | <b>Total Enrolled<br/>(<i>n</i> = 363)</b> |
|----------------------------------------------------|------------------------------------------|--------------------------------------------|
| Male, <i>n</i> (%)                                 | 67 (56.8)                                | 196 (54)                                   |
| Age in years, mean (SD)                            | 60.3 (15)                                | 59 (15.5)                                  |
| Age ≥ 65, <i>n</i> (%)                             | 49 (41.5)                                | 145 (39.9)                                 |
| Race, <i>n</i> (%)                                 |                                          |                                            |
| Caucasian                                          | 104 (88.1)                               | 324 (89.3)                                 |
| African American                                   | 11 (9.3)                                 | 35 (9.6)                                   |
| American Indian                                    | 1 (0.8)                                  | 1 (0.3)                                    |
| Asian                                              | 1 (0.8)                                  | 1 (0.3)                                    |
| Other                                              | 1 (0.8)                                  | 1 (0.3)                                    |
| Unknown                                            | 0 (0)                                    | 1 (0.3)                                    |
| BMI, median (25th, 75th)                           | 29.5 (24.4, 38)                          | 29.5 (24.9, 36.9)                          |
| Charlson comorbidity index, median (25th, 75th)    | 3 (2, 5)                                 | 3 (1, 5)                                   |
| APACHE II, median (25th, 75th)                     | 20 (14, 25)                              | 17 (11, 23)                                |
| Inter-facility hospital transfer, <i>n</i> (%)     | 55 (46.6)                                | 152 (41.9)                                 |
| Sepsis severity by Sepsis 2 criteria, <i>n</i> (%) |                                          |                                            |
| Sepsis                                             | 20 (16.9)                                | 110 (30.3)                                 |
| Severe sepsis                                      | 57 (48.3)                                | 156 (43)                                   |
| Septic shock                                       | 41 (34.7)                                | 97 (26.7)                                  |
| Sepsis severity by Sepsis 3 criteria, <i>n</i> (%) |                                          |                                            |
| Does not qualify                                   | 0 (0)                                    | 20 (5.5)                                   |
| Sepsis                                             | 83 (70.3)                                | 255 (70.2)                                 |
| Septic shock                                       | 35 (29.7)                                | 88 (24.2)                                  |
| Primary Sepsis Diagnosis, <i>n</i> (%)             |                                          |                                            |
| CLABSI/Bacteremia                                  | 2 (1.7)                                  | 8 (2.2)                                    |
| De Novo Intra-Abdominal Infection                  | 27 (22.9)                                | 105 (28.9)                                 |
| Necrotizing Soft Tissue Infection                  | 15 (12.7)                                | 43 (11.8)                                  |
| Pneumonia                                          | 26 (22)                                  | 58 (16)                                    |
| Surgical Site Infection                            | 34 (28.8)                                | 82 (22.6)                                  |
| Urosepsis                                          | 6 (5.1)                                  | 41 (11.3)                                  |
| Other                                              | 8 (6.8)                                  | 26 (7.2)                                   |
| Creatinine at sepsis onset, median (25th, 75th)    | 1.1 (0.7, 1.7)                           | 1.1 (0.7, 1.7)                             |
| ALC at sepsis onset, median (25th, 75th)           | 0.3 (0, 0.6)                             | 0.6 (0.3, 0.9)                             |
| Lactate at sepsis onset, median (25th, 75th)       | 1.7 (1.1, 2.7)                           | 1.7 (1.2, 2.8)                             |
| In-hospital mortality, <i>n</i> (%)                | 6 (5.1)                                  | 28 (7.7)                                   |
| ICU Length of Stay (LOS), median (25th, 75th)      | 19 (11, 28)                              | 7 (3, 17)                                  |
| Hospital LOS, median (25th, 75th)                  | 28 (21, 38)                              | 15 (8, 26)                                 |
| Maximum SOFA score 24 hours, median (25th, 75th)   | 9 (7, 12)                                | 7 (5, 10)                                  |

|                                                |           |            |
|------------------------------------------------|-----------|------------|
| Multiple Organ Failure incidence, <i>n</i> (%) | 74 (62.7) | 153 (42.3) |
| Clinical trajectory, <i>n</i> (%)              |           |            |
| Early Death                                    | 0 (0)     | 14 (3.9)   |
| CCI                                            | 79 (66.9) | 124 (34.2) |
| RAP                                            | 39 (33.1) | 225 (61.9) |
| Discharge disposition, <i>n</i> (%)            |           |            |
| “Good” disposition                             | 44 (37.3) | 207 (57)   |
| Home                                           | 7 (5.9)   | 72 (19.8)  |
| Home healthcare services                       | 26 (22)   | 109 (30)   |
| Rehab                                          | 11 (9.3)  | 26 (7.2)   |
| “Poor” disposition                             | 74 (62.7) | 156 (43)   |
| Long Term Acute Care facility                  | 34 (28.8) | 54 (14.9)  |
| Skilled Nursing facility                       | 20 (16.9) | 53 (14.6)  |
| Another Hospital                               | 9 (7.6)   | 13 (3.6)   |
| Hospice                                        | 5 (4.2)   | 8 (2.2)    |
| Death                                          | 6 (5.1)   | 28 (7.7)   |
| 30-day mortality, <i>n</i> (%)                 | 8 (6.8)   | 33 (9.4)   |
| 12-month mortality, <i>n</i> (%)               | 35 (29.7) | 76 (23.2)  |
| Zubrod at 12 months, median (25th, 75th)       | 3 (1, 5)  | 1 (1, 4.5) |

CCI = Chronic Critical Illness; RAP = Rapid Recovery; BMI = Body Mass Index; ALC = Absolute Lymphocyte Count; ICU = Intensive Care Unit; SOFA = Sequential Organ Failure Assessment Score.
