# Supplementary material for: Chronic Critical Illness Elicits a Unique Circulating Leukocyte Transcriptome in Sepsis Survivors
Source: J Clin Med. 2021 Jul 21;10(15):3211. doi: 10.3390/jcm10153211 (PMC8348105; doi:10.3390/jcm10153211)
Supplement: Supplementary file 1 [file jcm-10-03211-s001.zip › Table S2.xlsx]

## Sheet: CCI vs Healthy
List of significant gene probesets (FDR <0.01 and Fold Change > │2│ in chronic critical illness (CCI) sepsis patients at day 14 versus healthy controls.
Gene	FDR	FC
FCGR1CP	5.66731e-12	2.59722
FCGR1A	5.35683e-16	3.00108
S100A9	5.05849e-26	2.24723
FCER1G	7.04815e-24	2.01272
UQCRHL	4.28455e-20	2.44179
KCNA3	7.53728e-10	-2.34867
TSPAN2	6.09045e-17	2.10999
CD58	5.3707e-21	2.55117
FCGR1B	1.45513e-15	2.68726
S100A12	1.16482e-36	3.11026
AIM2	6.4553e-26	2.18636
F5	4.34218e-16	2.28134
FCMR	1.745e-13	-2.58544
SNORA14B	3.85226e-05	3.34679
MIR1537	2.29966e-07	-2.22957
MIR3916	1.76836e-08	-2.04749
CHD1L	2.20561e-13	2.5677
RUNX3	4.57255e-08	-2.00634
HSPB11	3.85412e-15	3.33891
S1PR1	1.89687e-07	-3.04908
RSBN1	2.80385e-16	2.09814
PTPN22	1.54992e-18	2.01842
BCL2L15	6.22086e-09	2.18072
CD58	2.09559e-21	3.04615
S100A10	1.76463e-09	2.11623
PBXIP1	2.58228e-12	-2.306
MPC2	3.67568e-17	2.18724
DENND1B	5.13666e-16	2.00384
ZNF281	2.98053e-14	2.40575
HNRNPU	4.80907e-09	-2.05212
QPCT	9.43243e-21	2.08333
IL18RAP	2.26603e-11	2.14811
RNU4ATAC	1.70252e-05	2.01598
TNFAIP6	2.29288e-21	5.05523
NDUFB3	2.30294e-25	2.08086
SCARNA5	4.23399e-07	2.44399
SF3B6	3.39099e-21	2.37622
NLRC4	3.9681e-19	2.63907
MXRA7	1.67894e-12	4.19566
CXCR2P1	2.30639e-07	-2.42359
SNORD82	7.69613e-07	-3.30995
TIA1	3.8758e-10	2.23407
TTN	1.2452e-12	2.06812
SCARNA5	5.61227e-07	2.43031
MBOAT2	3.31159e-11	2.15085
EIF2AK2	6.10234e-12	2.06674
DDX11L2	1.70909e-07	-2.35485
TSN	2.67037e-15	2.65284
TNFAIP6	4.56253e-20	5.90197
MXRA7	1.79666e-11	2.17441
ANKRD44-IT1	1.25031e-09	-2.11875
CXCR2P1	1.97077e-07	-2.08116
IL18R1	7.78042e-06	2.09179
CAMP	1.91093e-15	4.12973
CSTA	7.45228e-28	2.68856
LTF	6.48363e-12	2.01177
SPINK8	1.66614e-14	2.11108
THOC7	1.47935e-25	2.02849
PLSCR1	2.04792e-15	2.12442
MRPL47	1.0969e-13	2.34274
RAD54L2	6.11099e-13	-2.39193
ACTL6A	2.65221e-11	3.14442
EIF4G1	2.98419e-12	-2.18953
FAM43A	3.04583e-10	-2.5777
PCOLCE2	6.01325e-08	4.85968
SCARNA22	7.64127e-09	2.03262
S100P	2.93911e-24	3.43226
ANXA3	7.85538e-28	3.59814
SAP30	4.38704e-11	2.23772
COMMD8	7.62463e-16	2.09802
SULT1B1	4.20865e-16	2.15336
JCHAIN	1.99281e-14	2.28337
LEF1	1.50639e-08	-2.0564
ATP5I	1.01847e-19	2.00703
FBXL5	1.01717e-24	2.03618
FAM200B	8.77896e-23	2.06366
BST1	2.28692e-20	2.016
NAIP	1.28545e-13	2.10314
NAIP	1.53009e-10	2.12533
NDUFA2	1.09391e-17	2.06743
CCNB1	6.01773e-13	3.24647
HEXB	6.4336e-20	2.9504
TICAM2	1.22719e-20	3.13365
TCF7	8.32716e-10	-2.7249
CYSTM1	6.1559e-16	2.99739
EMB	3.34994e-19	2.51255
TMEM167A	6.62593e-20	2.31089
NDUFA2	5.06301e-16	2.79925
CD74	2.94177e-10	-2.51535
MAPK14	7.34697e-28	2.28792
RNY4	3.24061e-07	3.31996
SMPDL3A	7.06228e-15	2.0401
CENPW	1.19664e-18	2.70607
ARG1	7.4833e-14	3.29062
ABRACL	1.90554e-13	2.2473
RAB32	2.06359e-19	2.3788
HIST1H3B	1.8253e-13	2.50079
HIST1H4H	3.61792e-16	2.65214
HIST1H2BK	4.55978e-22	2.1574
CRISP3	7.32396e-10	3.19162
VNN1	9.185e-10	2.85502
SFT2D1	9.31871e-21	2.1162
SRPK1	1.43294e-21	2.44116
COX7A2	3.29217e-22	2.01668
HIST1H2AI	7.01064e-16	2.04938
SNORA22	3.25542e-10	2.79867
SDHAF3	7.77131e-21	2.53022
SNORA5A	1.1152e-07	2.62527
TP53TG1	5.552e-14	2.09888
SNX10	7.26348e-24	2.15522
NFE4	3.05025e-21	3.64024
NRF1	2.83502e-14	2.03084
INHBA	9.65838e-08	2.41208
CCDC71L	2.38129e-22	3.50364
PSMA2	3.39099e-21	2.10244
LY96	8.77896e-23	5.16614
ATP6V1C1	1.52797e-21	2.14973
DEFA4	1.93255e-15	8.3265
MYBL1	4.27815e-07	-2.17148
KLF10	1.20308e-13	2.00938
RRAGA	5.11031e-19	2.02022
CKS2	1.62645e-13	2.60421
UGCG	1.11267e-16	2.27279
NDUFB6	4.39953e-18	3.0323
NFIL3	5.44382e-19	2.03742
TXN	1.40107e-33	3.10123
FAM102A	2.73796e-13	-2.28325
AGTPBP1	1.90958e-17	2.49608
CKS2	3.12811e-11	3.0235
SPTLC1	8.78685e-21	3.10941
HSDL2	1.5934e-18	2.15432
CD72	3.72076e-11	-2.0343
PTCH1	4.12479e-09	-2.24027
FAM129B	2.52875e-18	3.24804
BMX	3.63613e-14	2.1828
TSPYL2	3.23792e-13	-2.09712
COX7B	8.6652e-23	2.17479
P2RY10	1.09062e-07	-2.01863
SOWAHD	4.92278e-15	2.01124
ALAS2	5.88108e-06	2.29866
DDX11L1	1.76836e-08	-2.00122
KDM5C	1.77039e-10	-2.24966
ATP6AP1	2.06462e-25	2.19238
SLC25A5	1.68141e-17	2.02326
CD24	7.22583e-15	2.9369
DDX11L1	1.76836e-08	-2.00122
AGAP6	5.67781e-13	-2.13829
UBE2D1	1.93709e-19	2.1499
CHCHD1	6.52385e-18	2.14484
AGAP12P	4.45996e-12	-2.09282
AGAP7P	3.48962e-12	-2.35041
ANKRD22	2.19754e-12	2.66503
SNORA12	5.25329e-06	3.83991
RAB18	1.24459e-25	3.25208
TAF5	1.38061e-12	2.40247
AGAP12P	3.37879e-12	-2.04385
SNORA23	3.11206e-05	2.7775
MS4A3	1.0493e-09	2.33099
MS4A4A	9.40634e-12	2.23343
CD5	3.46304e-09	-2.02678
POLR2G	2.25699e-10	2.16761
ARAP1	4.5037e-08	-2.0876
CD3E	1.4796e-08	-2.21348
SNORD97	3.66053e-08	2.59407
TCN1	5.24098e-10	4.01931
MMP8	4.27248e-09	5.15548
NEAT1	1.83355e-08	-2.08604
SPCS2	5.05766e-16	2.17528
EEF1G	2.8049e-09	-2.09691
CASP5	1.62861e-08	2.00745
CARD16	1.83564e-25	2.04005
CARD17	3.72783e-14	2.72508
CLEC4D	1.06028e-15	4.52312
ATP23	7.698e-14	2.14203
IRAK3	3.42388e-17	2.12199
SNORA53	4.16534e-06	2.88545
DRAM1	2.54646e-21	2.48272
SNORA49	9.672e-06	2.09022
C3AR1	1.40189e-13	2.11788
CLEC4E	1.46536e-12	2.43986
CLEC2B	4.05318e-18	2.01717
MANSC1	4.27996e-12	2.03065
PLBD1	1.22489e-23	2.185
GPR84	1.89999e-09	2.023
TESPA1	7.15049e-10	-2.04421
MGST1	1.00819e-13	3.35695
IRAK3	6.1747e-15	2.31172
CHPT1	3.16225e-15	2.53814
LIN7A	1.46421e-17	2.63017
COX6A1	3.39938e-16	2.43002
ATP5EP2	1.84767e-24	2.76852
OLFM4	4.78095e-07	2.36241
UCHL3	6.77132e-16	2.12876
TNFSF13B	4.7159e-20	2.11721
SNORA31	1.23088e-08	2.02807
KLF12	3.75476e-11	-2.02614
CDK8	5.15925e-13	3.00694
SUPT20H	7.42685e-18	3.14082
UFM1	8.834e-14	2.72817
DNAJC3	1.75644e-16	2.64199
FLT3	2.47486e-08	2.05261
RNASE3	1.28984e-11	3.3073
CTSG	1.69116e-09	3.12967
PPP2R3C	1.2533e-17	2.06053
PYGL	2.06462e-25	2.47351
SNORA79	1.65118e-14	8.7059
C14orf2	5.53676e-29	2.04389
ECRP	1.90474e-12	2.22701
C14orf93	2.09443e-18	2.44737
LGALS3	4.12991e-20	2.46885
HIF1A-AS2	3.70349e-21	2.53555
RBM25	1.40771e-07	-2.51304
IFI27L2	2.43564e-16	2.31051
SLIRP	7.93419e-17	2.12724
ECRP	2.77988e-15	3.03109
RNASE2	5.55071e-18	3.87099
NUSAP1	3.78224e-18	2.04389
NOP10	2.16311e-19	2.05984
NDUFAF1	4.20857e-21	2.02779
RSL24D1	1.26851e-13	2.00979
COX5A	1.51233e-17	2.15068
PWAR5	4.52654e-08	-2.05797
BCL2A1	1.14144e-23	3.13452
GOLGA8A	3.57751e-10	-2.44938
ST20	1.76174e-14	2.03238
PRKXP1	1.34742e-07	-2.02167
DDX11L9	8.85664e-08	-2.29745
GOLGA8A	1.70673e-10	-2.33594
PCLAF	3.54797e-19	2.05993
DDX11L10	9.05114e-09	-2.13099
SNHG9	2.98056e-16	2.78541
SRRM2	2.06462e-25	-2.24786
NPIPA1	4.87324e-17	-2.11023
MT1F	2.50705e-17	2.31067
HSBP1	1.88352e-19	2.21821
NDUFAB1	3.58414e-16	2.05188
SRRM2	1.66512e-21	-2.4191
PAQR4	6.19525e-13	2.40723
SBK1	1.35889e-09	-2.01224
FUS	4.59976e-19	-2.05642
NPIPB13	2.90987e-14	-2.01841
HBM	8.53191e-07	2.02745
NPIPA1	4.91882e-16	-2.27981
HP	1.56765e-11	3.04354
TXNDC17	1.24221e-22	2.75474
PSMB3	4.05935e-19	3.14541
KANSL1-AS1	9.83237e-09	2.27022
MAP2K6	1.01681e-18	2.18724
CCL5	2.57943e-08	-2.03963
CCL23	5.91191e-05	2.18448
CCR7	1.44953e-08	-2.87922
MIR5047	3.3879e-07	-2.09051
BIRC5	4.99376e-14	2.8945
ORMDL3	1.29857e-10	-2.15416
THRA1/BTR	1.49321e-08	-2.15149
TIMP2	2.07841e-22	2.30579
MIR3975	7.263e-08	-2.5845
SCARNA17	2.03583e-08	-2.24757
DSC2	7.59899e-18	2.79647
HAUS1	1.30976e-14	2.15054
C18orf32	1.14029e-21	2.04655
RETN	1.46665e-07	2.41793
MCEMP1	7.28607e-15	4.28852
UBL5	7.7682e-19	2.17949
ZFP36	5.63404e-08	-2.63318
CD177	1.55878e-08	2.37609
SNRNP70	1.20189e-16	-2.14901
UQCR11	5.74659e-14	2.68771
CLC	8.63539e-11	3.22961
CEACAM8	1.23209e-09	3.12175
PGLYRP1	3.31549e-18	3.23934
CARD8-AS1	6.47238e-19	2.05938
SNRNP70	4.83349e-11	-2.54819
SNRNP70	3.82911e-14	-2.02842
LENG8	9.87717e-20	-2.49777
CEACAM8	4.61061e-09	3.7001
LENG8	2.6854e-14	-2.08955
ZNF460	8.02359e-09	-2.40279
SMIM26	3.54585e-19	4.41345
CST7	2.03163e-15	2.266
PI3	3.88724e-07	2.29234
MMP9	3.28119e-10	2.02863
SNORA71A	9.97132e-07	2.77952
SLPI	2.30807e-15	5.62218
SNRPB2	1.32156e-15	2.12428
SMIM26	2.01688e-22	4.19641
ATP5E	7.09157e-25	2.06048
ATP5O	2.36871e-11	2.06463
SAMSN1	5.57729e-16	2.04206
ESS2	4.33844e-19	2.18382
FLOT1	6.62582e-23	2.37163

## Sheet: RAP vs Healthy
List of significant gene probesets (FDR <0.01 and Fold Change > │2│ in rapid recovery sepsis patients at day 14 versus healthy controls.
Gene	FDR	FC
NDUFS5	1.33675e-09	2.43826
FCGR1CP	9.15968e-07	2.42519
FCGR1A	3.35058e-08	2.78722
S100A9	1.59321e-10	2.19216
FCER1G	2.4378e-10	2.16009
CNIH4	6.00715e-09	2.02726
UQCRHL	3.69964e-13	2.71763
CD58	5.95323e-10	2.46313
FCGR1B	3.55157e-08	2.54863
S100A12	1.13099e-13	3.00688
AIM2	2.42646e-12	2.2279
F5	7.8586e-07	2.23226
MIR1537	2.70433e-08	-2.36195
MIR3916	2.80935e-07	-2.00495
CAPZA1	1.96981e-14	2.06086
CHD1L	7.50583e-09	3.03022
LOC105376805	2.5055e-10	2.08249
RUNX3	5.56249e-08	-2.00789
ZBTB8OS	6.50899e-10	2.01971
HSPB11	1.47457e-10	3.89391
S1PR1	2.4123e-05	-2.0985
RSBN1	1.28216e-09	2.20515
BCL2L15	3.46613e-05	2.24948
CD58	5.97747e-10	2.9329
S100A10	5.94171e-08	2.74498
PBXIP1	1.1633e-11	-2.26024
MPC2	2.4378e-10	2.4202
DENND1B	1.32731e-09	2.17257
ZNF281	1.20338e-07	2.57767
BCAS2	8.28553e-11	2.13642
RNF181	2.60728e-11	2.02015
TNFAIP6	2.26423e-09	4.6758
ASNSD1	1.42831e-09	2.09744
NDUFB3	1.31192e-10	2.11877
MRPL44	7.00534e-10	2.00861
SF3B6	8.58854e-11	2.54527
NLRC4	1.84079e-07	2.55059
MMADHC	4.02172e-11	2.00377
MXRA7	4.0004e-05	3.49921
SNORD82	2.81306e-05	-2.81735
TIA1	2.83774e-07	2.82608
HAT1	3.48012e-10	2.02585
MBOAT2	5.56764e-06	2.26027
EIF2AK2	2.60544e-08	2.09211
DDX11L2	4.40538e-06	-2.23398
TSN	4.01234e-11	3.16729
TNFAIP6	4.54012e-09	5.56841
ATP5G3	5.63545e-12	2.34484
MRPL33	2.42736e-11	2.08268
EIF1B	5.18003e-10	2.02027
CAMP	6.34827e-08	4.60242
CHMP2B	3.94684e-10	2.02498
CSTA	2.71111e-14	2.90278
LTF	1.43901e-07	2.06395
THOC7	6.36501e-16	2.10716
MRPL47	6.06999e-09	2.72662
RAD54L2	5.57711e-11	-2.18946
SKIL	1.54739e-06	2.11285
ACTL6A	1.31833e-05	3.44879
FAM43A	2.99549e-09	-2.34199
TNFSF10	1.87923e-09	2.3396
S100P	1.08294e-11	3.31821
ANXA3	8.3428e-09	3.02811
SNHG8	9.77177e-08	2.22049
SAP30	1.21711e-07	2.16367
COMMD8	4.33993e-11	2.17115
IGFBP7	4.81674e-10	2.06992
JCHAIN	7.06961e-08	2.24359
PF4	2.05821e-07	2.19957
PPM1K	2.16875e-06	2.12502
HPF1	1.05784e-09	2.06964
SNHG8	3.71834e-07	2.16688
ATP5I	2.37346e-12	2.18409
WDR1	1.72514e-17	2.18862
SLC39A8	2.87501e-05	2.4919
FAM200B	2.11115e-10	2.0449
BST1	1.57626e-08	2.06572
NAIP	1.98858e-05	2.34098
SLCO4C1	2.95639e-05	2.09651
NDUFA2	1.85037e-09	2.09171
CCNB1	6.96443e-08	2.98585
HEXB	1.9752e-11	3.56112
PJA2	2.52108e-11	2.00691
TICAM2	1.4144e-11	3.44736
CYSTM1	9.3849e-06	2.77852
EMB	9.75192e-10	2.8176
TMEM167A	4.93536e-12	2.52601
CETN3	8.79438e-07	2.02234
NDUFA2	4.39671e-09	3.04435
LY86	4.74215e-07	2.12002
HIST1H2BD	1.31192e-10	2.12521
SMPDL3A	3.69892e-08	2.04538
CENPW	3.06449e-11	2.59687
ARG1	8.06074e-06	2.71783
ABRACL	3.81204e-09	2.73313
RAB32	4.42275e-09	2.43293
GTF2H5	1.20413e-09	2.1523
HIST1H3B	8.18474e-07	2.20244
HIST1H1C	3.63709e-06	2.00813
HIST1H4H	4.19599e-10	2.81022
HIST1H2BK	9.32566e-12	2.3872
CRISP3	7.59018e-06	3.40913
VNN1	3.32224e-05	2.46141
SFT2D1	5.85009e-12	2.30067
SOX4	1.80135e-05	2.00231
SRPK1	4.03453e-08	2.08394
COX7A2	4.25773e-13	2.20342
HIST1H2AI	8.68166e-09	2.02396
SDHAF3	3.77449e-09	2.40352
CHCHD2	3.5858e-11	2.06854
TP53TG1	9.53902e-10	2.29169
SNX10	9.33662e-10	2.09819
NFE4	4.83576e-07	3.02394
NRF1	4.53785e-09	2.28078
GNA12	2.1379e-08	2.66885
INHBA	1.43448e-05	2.57786
FGL2	2.11657e-10	2.07612
CCDC71L	2.64597e-09	3.18262
PSMA2	4.98952e-12	2.34168
LY96	2.77941e-10	4.91001
ATP6V1C1	5.91764e-07	2.01481
DEFA4	7.10234e-08	8.66034
MRPL13	5.25683e-10	2.00077
KLF10	3.09357e-09	2.1663
RRAGA	2.25155e-13	2.26295
CKS2	3.53713e-07	2.70482
SEC61B	2.85287e-09	2.33683
UGCG	1.39284e-07	2.09059
NDUFB6	1.81535e-10	2.96654
CBWD5	4.83428e-08	2.03789
TXN	8.53352e-14	3.16316
AGTPBP1	4.01201e-10	2.75626
CKS2	7.83997e-07	3.37072
SPTLC1	1.51939e-12	3.57941
HSDL2	3.99394e-09	2.12002
FAM129B	4.43896e-10	3.52345
ORM1	5.89964e-06	2.12565
BMX	1.50584e-06	2.08231
COX7B	4.43204e-14	2.31495
SOWAHD	1.34794e-08	2.17295
ALAS2	2.27313e-05	3.04701
KDM5C	1.01622e-10	-2.27182
MAGED2	1.20295e-09	2.0583
ATP6AP1	2.29645e-11	2.35894
SLC25A5	8.82313e-15	2.37982
CD24	1.27906e-07	2.98399
ATP5C1	7.06109e-11	2.01773
CHCHD1	5.38919e-12	2.21507
AGAP7P	3.54802e-11	-2.11253
ANKRD22	1.47918e-08	2.78717
RAB18	6.9062e-13	3.17555
TAF5	1.16619e-08	2.82269
MS4A3	1.96176e-06	2.36045
MS4A4A	7.99328e-10	2.34963
POLR2G	1.48159e-08	2.75463
TMEM126A	1.66598e-08	2.26852
TCN1	6.06644e-07	4.00545
MMP8	1.59838e-06	4.79694
TIMM8B	2.46851e-10	2.25228
C11orf71	1.44795e-09	2.15865
LDHA	5.17171e-09	2.00403
NEAT1	6.71437e-10	-2.24962
SPCS2	8.00076e-11	2.44202
HIKESHI	4.80674e-10	2.26061
TMEM123	1.5068e-07	2.19827
RPS13	2.01085e-10	2.14428
TIMM8B	1.91831e-08	2.04541
COX8A	1.58743e-06	2.2597
CARD16	1.79635e-12	2.14279
CARD17	6.27858e-07	2.72448
CLEC4A	1.5699e-09	2.11642
CLEC4D	2.17491e-06	3.88434
FGFR1OP2	7.43947e-10	2.0439
ATP23	3.05534e-08	2.00849
DRAM1	4.22172e-10	2.21973
CLEC4E	1.69951e-06	2.21842
KLRB1	7.81335e-06	2.07078
CLEC2B	3.05219e-10	2.06346
MANSC1	1.41277e-06	2.00142
PLBD1	1.4038e-09	2.08376
MGST1	1.33652e-09	3.71526
SLC38A2	8.1027e-10	2.03282
IRAK3	9.67381e-07	2.11031
CHPT1	4.40954e-10	3.09618
LIN7A	5.84271e-08	2.55127
TMPO	6.35104e-09	2.62751
TESC	2.64512e-07	2.00641
COX6A1	5.81909e-09	2.70619
ATP5EP2	6.98559e-14	2.88918
UCHL3	6.34797e-11	2.34206
TNFSF13B	1.08931e-08	2.23391
SNORA31	7.24566e-10	2.16694
CDK8	3.66676e-08	3.49838
SUPT20H	5.39687e-09	3.54401
UFM1	4.73721e-09	2.87433
DNAJC3	4.22534e-07	2.42947
RNASE3	1.77632e-07	3.73479
MRPL52	2.46363e-07	2.07117
RTRAF	6.7461e-10	2.32723
PSMA3	2.80712e-10	2.14415
CTSG	2.11651e-05	2.91752
PPP2R3C	2.40723e-08	2.18606
PYGL	6.55665e-09	2.25432
SNORA79	1.66772e-06	7.70657
C14orf2	1.58289e-16	2.13205
ECRP	1.41518e-07	2.40092
C14orf93	7.65475e-09	2.6286
LGALS3	1.33623e-14	2.91364
PSMA3	7.35063e-11	2.29849
CHURC1	7.96807e-05	2.1215
BTBD6	5.95952e-08	2.03825
HIF1A-AS2	2.62793e-10	2.65875
RBM25	1.14285e-06	-2.07535
IFI27L2	1.50555e-11	2.37549
SLIRP	2.18465e-11	2.34626
ECRP	9.55945e-08	2.85701
RNASE2	1.04449e-08	3.95939
PSMA6	1.06919e-10	2.11604
CHURC1	4.29544e-14	2.01212
NUSAP1	2.96744e-09	2.00647
FAM103A1	4.32039e-09	2.11451
NOP10	7.88975e-10	2.06891
NDUFAF1	7.97326e-12	2.2957
RSL24D1	1.47565e-09	2.23299
COX5A	5.93398e-13	2.5795
FBXO22-AS1	4.43847e-15	2.08086
BCL2A1	5.67271e-09	2.06153
BCL2A1	3.31067e-11	3.05682
GOLGA8A	3.5875e-09	-2.20277
EHD4	2.14991e-09	2.46054
MYO9A	4.82887e-07	2.39184
FBXO22-AS1	1.88031e-12	2.25002
HMG20A	1.15263e-08	2.30718
GOLGA8A	2.02981e-09	-2.09363
NDUFB10	3.81841e-09	2.18001
SNHG9	6.30834e-09	2.68109
SRRM2	4.18176e-21	-2.0115
MT1F	1.14789e-11	2.44181
HSBP1	1.46789e-10	2.28285
NDUFAB1	4.58258e-11	2.34137
SRRM2	1.89955e-17	-2.17038
PAQR4	2.0158e-09	2.48305
MT2A	2.4438e-07	2.07381
HP	7.5978e-07	2.8867
KANSL1-AS1	2.53555e-05	2.12912
KANSL1-AS1	4.55374e-05	2.14164
TXNDC17	4.43204e-14	2.79441
PSMB3	1.17438e-09	3.322
KANSL1-AS1	1.4828e-05	2.40416
MAP2K6	3.29145e-07	2.06575
C1QBP	4.87562e-09	2.31118
EVI2A	5.93785e-11	2.13284
MRPS23	3.54224e-07	2.16842
ATP5H	1.99236e-10	2.15478
BIRC5	5.49559e-08	2.74498
NME1-NME2	6.81165e-09	2.19934
METTL23	2.6618e-09	2.06135
STX8	2.67078e-10	2.00697
SLC25A39	1.8354e-07	2.27539
TIMP2	1.49433e-08	2.25582
SNRPD1	5.81519e-10	2.21471
MIR3975	7.28482e-06	-2.03165
HAUS1	1.07137e-09	2.10913
SCARNA17	3.60729e-08	-2.20786
DSC2	6.83555e-08	2.42472
HAUS1	1.86697e-09	2.27299
TXNL1	8.18427e-13	2.18389
C18orf32	8.3141e-11	2.00629
MRPL54	8.36449e-06	2.2601
RETN	3.92858e-05	2.17653
MCEMP1	1.56108e-05	3.17725
UBL5	2.88016e-09	2.30561
ZFP36	4.09579e-06	-2.1726
SNRNP70	1.06757e-16	-2.15676
RPS5	9.49432e-06	2.13613
UQCR11	5.85135e-08	2.84536
UQCRFS1	7.23422e-14	2.14266
POLR2I	8.55428e-11	2.0336
CLC	3.44133e-07	4.18825
BLVRB	4.92046e-07	2.05094
CEACAM8	2.00503e-07	3.44027
PGLYRP1	2.92194e-08	3.27952
CARD8-AS1	4.54554e-11	2.09307
SNRNP70	2.94048e-11	-2.59045
LENG8	6.75681e-18	-2.27754
SPINT2	1.27988e-10	2.35688
CEACAM8	2.73899e-07	4.11227
PANK2	1.94692e-10	2.0203
SMIM26	3.11942e-12	4.44947
CST7	1.02659e-05	2.07661
PCNA	2.22555e-10	2.11122
SLPI	1.28699e-05	3.7844
PANK2	6.12893e-11	2.04272
SNRPB2	1.23454e-10	2.25105
SMIM26	1.47964e-14	4.33614
EIF6	2.49573e-14	2.30903
SLMO2-ATP5E	1.0417e-11	2.0994
ATP5E	1.92214e-15	2.25576
ATP5O	1.62892e-09	2.48732
UQCR10	1.68542e-08	2.2357
NDUFA6	1.87834e-11	2.14809
ESS2	1.61375e-09	2.24353
FLOT1	8.72522e-09	2.36633

## Sheet: CCI vs RAP
List of significant gene probesets (p-value <0.001 and Fold Change > │2│ in direct comparison of rapid recovery sepsis patients versus CCI patients at day 14
Gene	P-value	FC
ERMAP	0.000150098	1.74274
WDR3	0.000399484	1.47468
RPL22	0.00019957	2.00954
NOL9	0.000987255	1.59933
EXOSC10	0.000374114	1.70317
TESK2	0.000584375	1.69907
CD84	0.000259029	1.60479
ARL8A	0.000503905	2.35724
FCMR	0.000263818	1.75274
SH3BP5L	0.000526073	1.8522
LY9.1	0.000858856	1.51591
LOC729737	0.000672704	2.92361
S1PR1.1	0.000616815	1.37861
ALMS1	0.00098649	1.405
ARID5A	0.000852497	2.06471
DDX18	0.000880269	1.66975
STK16	3.9567e-05	1.89025
DHX57	0.000661885	1.4913
BCL11A	3.27931e-05	1.60292
ANAPC1.1	0.000516063	1.49807
LANCL1	0.000869793	1.56686
DOCK10	0.000780423	1.64614
PID1	2.97024e-05	1.60332
HK2.1	0.000938408	1.51846
RDH14	0.000234927	1.64829
IRAK2	5.33153e-05	1.80759
EIF4E3	4.59754e-05	2.51549
TMEM41A	0.000192186	1.62815
PFKFB4	0.000585218	1.94333
HSP90AB3P	0.000318534	1.50033
DCAF16	0.000512405	1.62879
LEF1	0.000541404	1.56414
CTSO	0.000231477	1.52584
HSP90AB3P.1	0.000804324	1.71595
LEF1-AS1.1	0.000493497	1.46298
AREG	0.000516661	1.73326
AREG.1	0.00056141	1.77769
JMY	0.000696291	1.46044
SRFBP1	0.000526192	1.46687
KIF4B	0.000265371	1.75744
TTC37	0.000934519	1.49701
ZNF608	0.000478398	1.83369
P4HA2	0.000641526	1.66887
SMAD5-AS1	0.000776997	1.41066
CD74	0.000791226	2.23814
ZFP62	0.000621727	1.55328
TCF7.1	0.000894031	1.64723
G3BP1.1	0.000362917	1.65171
TNIP1.1	0.000299587	2.26541
HLA-DRA	0.000657394	2.28603
HLA-DPB1	0.000861778	1.89471
HLA-DPB2	0.000409876	1.56562
NEU1	9.03134e-05	1.99001
HLA-DPA1	0.000547235	1.83499
HLA-DPB2.2	9.47312e-05	1.42493
TNFAIP3.1	0.000624625	2.40948
HLA-DMB	0.000176035	1.70604
FKBP9	0.000849997	1.83509
MIR3146	0.00042546	1.25514
GRB10	7.28656e-05	1.85612
EPHB4	0.000251827	1.91516
IMPDH1	0.000427999	2.14932
ZNF425	0.000944869	1.6125
TWIST1.1	9.83969e-07	1.68184
GIMAP7.1	0.000339656	1.95008
PRAG1	0.000455882	1.63286
PABPC1	0.000287849	2.36629
UBAP1	0.00062437	2.13452
MLLT3	0.000313461	1.56161
ZNF484	0.000139989	1.4958
TMEM245	0.000474738	1.50282
POLR1E.1	0.000683692	1.54895
ZNF41	0.000868041	1.69716
LAS1L	0.000967085	1.60294
TSC22D3	0.0001048	1.92653
FGF13.1	0.000126615	2.19332
RBMY3AP	8.37501e-05	1.45024
CC2D2B	0.000439836	1.48687
INPP5F	0.000964825	1.50477
HNRNPA1P33	4.75138e-05	1.84893
ABLIM1	0.00056392	1.57481
BMI1	0.000851396	1.51008
EHBP1L1	0.000626537	2.12152
RNF214	0.000793251	1.70814
BACE1-AS	0.000788807	1.4283
MPEG1	0.000248148	1.94778
RBM4B	0.000740606	1.64421
TCIRG1	0.000338383	2.1453
KMT2A.1	0.000984955	1.69468
LOC100049716	0.000527688	1.85707
CD4	0.000130937	1.67318
KLHL42	0.000211006	1.70065
CRADD	6.48331e-05	1.7512
DCP1B	0.000976182	1.53718
NELL2	0.000101183	1.37679
TESPA1	0.000751707	1.42874
VSIG10	0.000519389	1.77209
CD4.1	0.000412513	1.71758
ST13P4	0.000104788	1.57557
RBM26	0.000810419	1.70477
GPR18	0.000329157	1.48801
GPR183	0.000591054	1.73978
ST13P4.1	0.000302757	1.50681
APEX1	0.000677949	1.75433
OXA1L	0.000746717	1.93201
JDP2	0.000473262	2.08948
ZC3H14	0.000560655	1.66123
SNORD114-6	0.00085076	1.40173
MIR1197	0.000181894	1.43838
MIR668	2.32985e-05	1.98007
DDX24	0.000365776	1.75351
DHRS4-AS1.1	0.000823091	1.61994
ACAN	0.000564741	2.02036
ZNF75A	0.000305288	1.5935
MKL2	0.00038228	1.49171
MKL2.2	0.000916403	1.34229
DCUN1D3	0.000160538	1.98122
RAPGEFL1	0.000579029	1.72235
NOG	0.000490212	1.32034
SLC16A3	0.000108707	2.33244
TSR1	0.000963349	1.63961
CAMKK1	7.38047e-05	1.81458
CLEC10A	0.000518272	1.62002
FLOT2	0.000185322	2.61742
C17orf62	9.32747e-05	2.19623
LOXHD1	0.000304726	1.67386
ZNF567	0.000732763	1.53501
NCR1	0.000619169	1.90828
GMIP	0.000391517	2.35239
FBL	7.93301e-05	2.02019
ZNF160	0.000953283	1.74129
ZNF134	0.000544578	1.61158
ESF1	0.000922564	1.50628
CHD6	0.000181702	1.53584
SCAF4	0.000473083	1.71373
KCNE1	2.22655e-05	1.79267
POFUT2	0.000691307	1.73209
LIMK2	0.000279315	2.38751
TOM1	0.000692344	2.04355
EIF3L	0.000767227	1.88604
NEU1.1	9.03134e-05	1.99001
HLA-DQB2.2	0.000613502	1.71548
HLA-DPA1.1	0.000576912	1.84148
HLA-DMB.1	0.000294077	1.67995
HLA-DPB1.1	0.000865455	1.84351
HLA-DPB2.3	0.000285139	1.56841
HLA-DRA.1	0.000735572	2.2148
NEU1.2	6.4761e-05	1.98482
HLA-DQB2.3	0.000613502	1.71548
HLA-DPA1.2	0.00058282	1.9133
HLA-DPB1.2	0.000386385	1.89283
HLA-DPB2.4	0.000287778	1.61568
HLA-DMB.2	0.000288851	1.67715
HLA-DRA.2	0.000741892	2.20062
HLA-DPB1.3	0.000867034	1.8434
NEU1.3	9.03134e-05	1.99001
HLA-DPA1.3	0.000547235	1.83499
HLA-DMB.3	0.000259891	1.67441
HLA-DRA.3	0.000418069	2.23352
NEU1.4	9.03134e-05	1.99001
HLA-DRB4.3	0.000422231	1.7438
HLA-DPA1.4	0.000552589	1.84023
HLA-DMB.4	0.000310815	1.68022
HLA-DPB1.4	0.000907016	1.84404
HLA-DPB2.5	0.000470082	1.64013
HLA-DRA.4	0.00043358	2.23256
NEU1.5	9.03134e-05	1.99001
HLA-DPA1.5	0.000576912	1.84148
HLA-DPB1.5	0.000865455	1.84351
HLA-DMB.5	0.000306216	1.67861
HLA-DRA.5	0.00043358	2.23256
NEU1.6	9.03134e-05	1.99001
HLA-DPA1.6	0.000552589	1.84023
HLA-DPB1.6	0.000954249	1.84779
HLA-DPB2.7	0.000470082	1.64013
HLA-DMB.6	0.000254502	1.67531
HLA-DRA.6	0.00043358	2.23256
HLA-DPB1.7	0.000867034	1.8434
HLA-DPB2.8	0.000433552	1.62125
NEU1.7	9.03134e-05	1.99001
HLA-DRB1.5	0.000887456	2.3828
HLA-DQB1.11	0.000711785	1.68787
HLA-DPA1.7	0.000524573	1.83672
HLA-DMB.7	0.000317934	1.68483
ZNF26.1	0.000648062	1.63562

## Sheet: KEGG enrichment_CCIvRAP
KEGG enrichment analysis of biological processes using significant genes from direct comparison of CCI vs RAP at day 14. Highlighted terms are significant by adjusted p-value at 0.1.
Term	Overlap	P-value	Adjusted P-value	Old P-value	Old Adjusted P-value	Odds Ratio	Combined Score	Genes
Antigen processing and presentation	6/77	7.94346e-05	0.00683137	0	0	9.32127	87.9981	CD74;CD4;HLA-DMB;HLA-DPB1;HLA-DRA;HLA-DPA1
Asthma	4/31	0.000183404	0.00788637	0	0	16.1964	139.351	HLA-DMB;HLA-DPB1;HLA-DRA;HLA-DPA1
Allograft rejection	4/38	0.000409085	0.0113481	0	0	12.8573	100.308	HLA-DMB;HLA-DPB1;HLA-DRA;HLA-DPA1
Graft-versus-host disease	4/41	0.000549252	0.0113481	0	0	11.8131	88.68	HLA-DMB;HLA-DPB1;HLA-DRA;HLA-DPA1
Type I diabetes mellitus	4/43	0.000659772	0.0113481	0	0	11.2061	82.0693	HLA-DMB;HLA-DPB1;HLA-DRA;HLA-DPA1
Intestinal immune network for IgA production	4/48	0.00100355	0.0141662	0	0	9.93019	68.5601	HLA-DMB;HLA-DPB1;HLA-DRA;HLA-DPA1
Tuberculosis	7/179	0.0014123	0.0141662	0	0	4.49115	29.4733	CD74;HLA-DMB;IRAK2;HLA-DPB1;HLA-DRA;TCIRG1;HLA-DPA1
Autoimmune thyroid disease	4/53	0.00145703	0.0141662	0	0	8.91465	58.2247	HLA-DMB;HLA-DPB1;HLA-DRA;HLA-DPA1
Rheumatoid arthritis	5/91	0.00156929	0.0141662	0	0	6.37242	41.1475	HLA-DMB;HLA-DPB1;HLA-DRA;TCIRG1;HLA-DPA1
Th1 and Th2 cell differentiation	5/92	0.00164723	0.0141662	0	0	6.29885	40.3672	CD4;HLA-DMB;HLA-DPB1;HLA-DRA;HLA-DPA1
Hematopoietic cell lineage	5/97	0.00208024	0.0155468	0	0	5.95501	36.7738	CD4;HLA-DMB;HLA-DPB1;HLA-DRA;HLA-DPA1
Viral myocarditis	4/59	0.00216932	0.0155468	0	0	7.93973	48.6971	HLA-DMB;HLA-DPB1;HLA-DRA;HLA-DPA1
Inflammatory bowel disease (IBD)	4/65	0.00309153	0.0195777	0	0	7.1566	41.3586	HLA-DMB;HLA-DPB1;HLA-DRA;HLA-DPA1
Th17 cell differentiation	5/107	0.00318707	0.0195777	0	0	5.36846	30.8614	CD4;HLA-DMB;HLA-DPB1;HLA-DRA;HLA-DPA1
Staphylococcus aureus infection	4/68	0.00363986	0.0208685	0	0	6.8201	38.3004	HLA-DMB;HLA-DPB1;HLA-DRA;HLA-DPA1
Leishmaniasis	4/74	0.00492726	0.026484	0	0	6.23362	33.1191	HLA-DMB;HLA-DPB1;HLA-DRA;HLA-DPA1
RNA degradation	4/79	0.00620907	0.0314106	0	0	5.81657	29.5583	TTC37;EXOSC10;PABPC1;DCP1B
Cell adhesion molecules (CAMs)	5/145	0.0112955	0.0539673	0	0	3.90377	17.502	CD4;HLA-DMB;HLA-DPB1;HLA-DRA;HLA-DPA1
Phagosome	5/152	0.0136289	0.0616886	0	0	3.71655	15.9647	HLA-DMB;HLA-DPB1;HLA-DRA;TCIRG1;HLA-DPA1
Herpes simplex virus 1 infection	10/492	0.0165017	0.0709573	0	0	2.292	9.40703	ZNF484;CD74;HLA-DMB;ZNF160;ZNF41;HLA-DPB1;HLA-DRA;ZNF425;ZNF567;HLA-DPA1
Toxoplasmosis	4/113	0.0209186	0.0856667	0	0	3.99534	15.4504	HLA-DMB;HLA-DPB1;HLA-DRA;HLA-DPA1
Systemic lupus erythematosus	4/133	0.0351764	0.137508	0	0	3.37248	11.289	HLA-DMB;HLA-DPB1;HLA-DRA;HLA-DPA1
Human T-cell leukemia virus 1 infection	5/219	0.0531552	0.198754	0	0	2.54426	7.46624	CD4;HLA-DMB;HLA-DPB1;HLA-DRA;HLA-DPA1
Influenza A	4/171	0.0745941	0.267296	0	0	2.60006	6.74896	HLA-DMB;HLA-DPB1;HLA-DRA;HLA-DPA1
Lysosome	3/123	0.105908	0.364324	0	0	2.70536	6.07403	CTSO;NEU1;TCIRG1
Epstein-Barr virus infection	4/201	0.116554	0.385525	0	0	2.20075	4.73028	HLA-DMB;HLA-DPB1;HLA-DRA;HLA-DPA1
Other glycan degradation	1/18	0.154093	0.490815	0	0	6.32928	11.837	NEU1
Other types of O-glycan biosynthesis	1/22	0.18499	0.551939	0	0	5.12267	8.64428	POFUT2
Colorectal cancer	2/86	0.189079	0.551939	0	0	2.56714	4.2758	LEF1;AREG
Protein export	1/23	0.192537	0.551939	0	0	4.88958	8.05542	OXA1L
Collecting duct acid secretion	1/27	0.222037	0.615972	0	0	4.1365	6.22507	TCIRG1
Axon guidance	3/181	0.235189	0.625153	0	0	1.81847	2.63198	ABLIM1;LIMK2;EPHB4
Ribosome biogenesis in eukaryotes	2/101	0.239884	0.625153	0	0	2.17652	3.1072	FBL;WDR3
Base excision repair	1/33	0.264288	0.649394	0	0	3.35988	4.47105	APEX1
Fructose and mannose metabolism	1/33	0.264288	0.649394	0	0	3.35988	4.47105	PFKFB4
Thyroid cancer	1/37	0.29118	0.676796	0	0	2.98596	3.68412	LEF1
Primary immunodeficiency	1/37	0.29118	0.676796	0	0	2.98596	3.68412	CD4
Sphingolipid metabolism	1/47	0.354208	0.799812	0	0	2.33566	2.42411	NEU1
Arginine and proline metabolism	1/49	0.366128	0.799812	0	0	2.23811	2.24879	P4HA2
Vibrio cholerae infection	1/50	0.372006	0.799812	0	0	2.19232	2.16787	TCIRG1
Endometrial cancer	1/58	0.417117	0.8706	0	0	1.88387	1.64723	LEF1
Hippo signaling pathway	2/160	0.436849	0.8706	0	0	1.35969	1.12605	LEF1;AREG
Basal cell carcinoma	1/63	0.443659	0.8706	0	0	1.7315	1.40719	LEF1
Central carbon metabolism in cancer	1/65	0.453936	0.8706	0	0	1.67722	1.32467	SLC16A3
Acute myeloid leukemia	1/66	0.459004	0.8706	0	0	1.65134	1.28589	LEF1
Epithelial cell signaling in Helicobacter pylori infection	1/68	0.468999	0.8706	0	0	1.60188	1.21287	TCIRG1
Adherens junction	1/72	0.488442	0.8706	0	0	1.51133	1.08292	LEF1
Arrhythmogenic right ventricular cardiomyopathy (ARVC)	1/72	0.488442	0.8706	0	0	1.51133	1.08292	LEF1
Inositol phosphate metabolism	1/74	0.497896	0.8706	0	0	1.46977	1.02497	INPP5F
Transcriptional misregulation in cancer	2/186	0.515153	0.8706	0	0	1.16601	0.773407	BMI1;MLLT3
Synaptic vesicle cycle	1/78	0.516286	0.8706	0	0	1.39314	0.920996	TCIRG1
ErbB signaling pathway	1/85	0.546871	0.872469	0	0	1.27659	0.770477	AREG
TGF-beta signaling pathway	1/90	0.567532	0.872469	0	0	1.20457	0.682336	NOG
mRNA surveillance pathway	1/91	0.571551	0.872469	0	0	1.19112	0.666317	PABPC1
Fc gamma R-mediated phagocytosis	1/91	0.571551	0.872469	0	0	1.19112	0.666317	LIMK2
Human immunodeficiency virus 1 infection	2/212	0.585972	0.872469	0	0	1.0203	0.545331	CD4;LIMK2
Prostate cancer	1/97	0.594893	0.872469	0	0	1.11634	0.579797	LEF1
Phosphatidylinositol signaling system	1/99	0.602389	0.872469	0	0	1.09344	0.554214	INPP5F
T cell receptor signaling pathway	1/101	0.609747	0.872469	0	0	1.07147	0.530066	CD4
Melanogenesis	1/101	0.609747	0.872469	0	0	1.07147	0.530066	LEF1
Drug metabolism	1/108	0.634451	0.872469	0	0	1.00102	0.455458	IMPDH1
Neurotrophin signaling pathway	1/119	0.670164	0.872469	0	0	0.907194	0.363089	IRAK2
AMPK signaling pathway	1/120	0.673233	0.872469	0	0	0.899525	0.355909	PFKFB4
Purine metabolism	1/129	0.699609	0.872469	0	0	0.835895	0.29861	IMPDH1
Natural killer cell mediated cytotoxicity	1/131	0.705176	0.872469	0	0	0.822952	0.287463	NCR1
Oxidative phosphorylation	1/133	0.710641	0.872469	0	0	0.8104	0.276823	TCIRG1
Insulin signaling pathway	1/137	0.72127	0.872469	0	0	0.786405	0.256951	FLOT2
Signaling pathways regulating pluripotency of stem cells	1/139	0.726438	0.872469	0	0	0.774929	0.247669	BMI1
Apoptosis	1/143	0.73649	0.872469	0	0	0.752947	0.230296	CTSO
Adrenergic signaling in cardiomyocytes	1/145	0.741377	0.872469	0	0	0.742414	0.222164	KCNE1
Breast cancer	1/147	0.746174	0.872469	0	0	0.732169	0.214376	LEF1
Gastric cancer	1/149	0.750883	0.872469	0	0	0.722202	0.206915	LEF1
mTOR signaling pathway	1/152	0.757784	0.872469	0	0	0.707745	0.196299	GRB10
Ribosome	1/153	0.760041	0.872469	0	0	0.703053	0.192906	RPL22
Cushing syndrome	1/155	0.764494	0.872469	0	0	0.693852	0.186328	LEF1
Wnt signaling pathway	1/158	0.771019	0.872469	0	0	0.68049	0.176956	LEF1
RNA transport	1/165	0.785554	0.872679	0	0	0.651213	0.15718	PABPC1
Hepatocellular carcinoma	1/168	0.791499	0.872679	0	0	0.639417	0.149513	LEF1
Alcoholism	1/180	0.813683	0.885782	0	0	0.596187	0.122924	CAMKK1
Regulation of actin cytoskeleton	1/214	0.864586	0.92943	0	0	0.500153	0.0727745	LIMK2
Cytokine-cytokine receptor interaction	1/294	0.936228	0.973111	0	0	0.362109	0.0238617	CD4
MAPK signaling pathway	1/295	0.936826	0.973111	0	0	0.360858	0.0235487	AREG
MicroRNAs in cancer	1/299	0.939166	0.973111	0	0	0.355942	0.0223401	BMI1
Human papillomavirus infection	1/330	0.954602	0.975157	0	0	0.321891	0.0149553	TCIRG1
PI3K-Akt signaling pathway	1/354	0.963818	0.975157	0	0	0.299637	0.0110423	AREG
Pathways in cancer	1/530	0.993205	0.993205	0	0	0.198138	0.00135092	LEF1
