# Supplementary material for: Chronic Critical Illness Elicits a Unique Circulating Leukocyte Transcriptome in Sepsis Survivors
Source: J Clin Med. 2021 Jul 21;10(15):3211. doi: 10.3390/jcm10153211 (PMC8348105; doi:10.3390/jcm10153211)
Supplement: Supplementary file 1 [file jcm-10-03211-s001.zip › Table S3.xlsx]

## Sheet: CCI Good v Poor
Gene	P-value	FC
ABCA2	0.000157873	-3.30455
ABCC3	0.000348308	-2.90206
ABCD1	0.000743039	-3.1866
ACP2	0.000316066	-2.72764
ACP5	0.00065428	-2.95568
ADGRL1.1	4.39153e-05	-2.96164
AGAP2	6.09632e-05	-3.44662
AGBL5	0.000374146	-2.56476
AGPAT2	0.000585815	-3.84942
AK9	8.91119e-05	-1.93866
AKNA	0.000805347	-4.16115
AKT2	7.74259e-06	-3.26205
AMER2	0.000979768	-2.88838
AP2A1	0.000191499	-3.51538
ARHGDIA	0.000123365	-3.54951
ARL10	0.000927429	-2.80059
ASB3	0.000595993	-2.21328
ATG12	8.44083e-06	-2.62485
ATG9A	0.000173829	-3.52518
ATP13A1	0.000306569	-3.15395
ATP13A2	0.000540408	-3.13009
ATXN1L.2	0.000690775	-3.1171
AXIN1	0.000677082	-3.26709
B4GALT3	8.91225e-05	-2.97031
BAG6	1.68653e-05	-3.64524
BAG6.1	2.05397e-05	-3.66618
BAG6.2	1.31871e-05	-3.65359
BAG6.3	1.50526e-05	-3.64806
BAG6.4	1.83571e-05	-3.655
BAG6.5	1.88529e-05	-3.67112
BAG6.6	2.05397e-05	-3.66618
BAK1	0.000542795	-3.30815
BAP1	0.000815565	-3.18779
BCKDHA	0.000150633	-3.69387
BCL3	0.000165697	-4.12727
BCORL1	0.000330063	-3.15481
BCR	0.00041287	-2.90615
BCR.1	2.64177e-05	-2.71122
BCRP3	0.000586249	-3.35293
BCRP3.1	0.000674059	-3.27241
BLK	4.97451e-07	-2.54857
CACNA1E	0.000141423	-2.60062
CALHM2	0.000374331	-3.67203
CALY	0.000642706	-3.5901
CASC3	0.000338932	-5.18937
CASZ1	0.000206006	-2.82429
CBX4	8.53656e-05	-3.81963
CCDC112	0.000155073	-2.25075
CCNF	0.000168379	-2.87194
CD72.1	0.000685262	-2.91157
CDC42SE1	0.000678909	-4.50887
CDIPT	0.000583312	-3.56824
CH17-340M24.3	0.00011957	-2.24559
CHERP	0.000178083	-3.44888
CIC	6.81393e-05	-3.41869
CLSTN3	0.000586701	-3.13023
CNN2	0.00049423	-5.75162
CNOT3	0.000797854	-4.09809
CNTROB	0.000593776	-3.07958
CRYBG1.1	0.000156233	-3.19031
CTBP1	0.000163726	-3.19251
CYB5R3	9.74318e-06	-3.83204
DCAF8L2	0.000728738	-2.7411
DCTN1.1	0.000996058	-3.33657
DDX54	0.00018707	-3.30737
DEAF1	5.25739e-05	-3.11704
DEDD	0.000254966	-3.48561
DENND1C	0.00082289	-3.73755
DGKZ	0.000367705	-3.33894
DPY19L4	0.00071665	-1.85013
DVL2	0.000476417	-2.86102
DYSF	0.00088282	-5.13756
EHD1	1.27072e-05	-3.6903
EHMT2	0.0007985	-3.05385
EHMT2.2	0.000795829	-3.05661
EHMT2.3	0.000808381	-3.05639
EHMT2.5	0.00086343	-3.06688
EMD	0.000449456	-3.18117
EPHB4	0.000559784	-3.05682
ERF	4.85225e-05	-3.38189
ERFE	7.83301e-05	-3.46301
EVI5	0.000695503	-2.23148
EXOSC8	0.000718269	-2.29963
FAM117A	8.28336e-05	-3.52353
FAM214B	0.000855034	-3.48692
FAM53C	0.000569795	-2.92932
FAM57B	0.000546321	-3.20462
FBRS	0.000247931	-3.45615
FCER2	1.57517e-05	-2.64179
FGL2.1	0.000939811	-6.47296
FHL3	0.000326294	-3.16566
FLOT2	0.000260523	-5.10671
FOSL2	0.000305152	-3.73125
FOXO3	0.000692909	-4.18257
FOXO4	6.12122e-06	-3.36481
FRG1JP	0.000681509	-2.97831
FURIN	4.78763e-05	-4.16643
GAA	3.24098e-05	-3.40374
GATAD2A	2.77004e-05	-3.47812
GFY	0.000148579	-2.27609
GNA12	0.000824175	-2.8805
GPALPP1	0.000961765	-2.56858
GPR137	0.000462564	-3.48968
GRAMD1A	0.000542159	-3.9282
GRINA	0.000466911	-4.4562
GTPBP10	0.000998127	-1.90599
GTPBP8	0.000692479	-2.14842
GUCD1	5.04195e-06	-3.61624
HAS3	0.000236902	-3.1704
HCRTR1	0.000870197	-2.75219
HDAC4	0.000888725	-3.22202
HDAC7	0.00042541	-3.3029
HMGA1.1	0.000470924	-4.1092
HMX1	0.000759438	-3.25434
IFNGR2.1	0.000126418	-2.9383
IL2RB	0.000947632	-3.33937
ILKAP	0.00065776	-2.53592
IMPA1	0.000912355	-2.18966
INTS1	0.000223458	-3.47219
IPO4	0.00052892	-2.96183
JUP	0.000710946	-3.00898
KCNQ1OT1	0.000399885	-1.92094
KCNS1	0.000849014	-2.65546
KDM5C.1	0.000137222	-3.4817
KDM6B	0.00072854	-5.21079
KHNYN	7.31871e-05	-3.68479
KIAA0895L	0.000263259	-2.81325
KIF1C	0.000899974	-3.24657
KLF13	0.000474533	-3.6014
KREMEN1	0.000425497	-3.98379
KRT85	0.000516475	-2.72572
KXD1	0.000798572	-3.97787
KXD1.1	0.000211483	-4.41599
LASP1	6.01124e-05	-4.32499
LCE3A	0.000891177	-3.42949
LDLRAP1	0.000127029	-3.06597
LENG8	0.000940315	-3.89385
LENG8.1	3.16265e-05	-5.50022
LIMK2	0.000740664	-4.38801
LINC00909	5.97752e-05	-2.65854
LINC01061.2	0.000203218	-3.66885
LOC283788	0.000683335	-2.96089
LOC554206.1	5.14788e-05	-2.77213
LPAR2	0.000188652	-3.50664
LRP10	0.000503008	-4.75989
LRRC4	9.01376e-05	-3.63576
LSP1	0.000659986	-4.34943
LYNX1.1	0.000880846	-2.79204
MAN2B2	0.000396335	-3.1989
MAP7D1	0.000828694	-3.74072
MAPKAPK2	0.000747028	-4.64132
MBD6	0.000616708	-3.78215
MBOAT7	0.000506071	-4.44694
METTL5	0.000894961	-2.8741
MIDN	0.000804218	-3.72681
MINK1	0.000401688	-3.31393
MIR3622B	0.000987195	-4.11912
MIR3689D1	5.22519e-06	-3.4602
MIR3689D2	1.51757e-05	-3.29723
MIR4669	0.000194235	-5.23557
MIR4730	2.23015e-05	-3.2381
MIR4780	0.000136833	-3.52662
MLLT1	0.000145686	-4.02576
MLLT6	6.70009e-05	-3.32586
MMP25	0.000795058	-4.35027
MNT	0.000346873	-3.90333
MPC1	0.000404085	-2.30606
MRPL32	0.000995256	-2.40137
NACC1	4.87707e-06	-3.55521
NFE2L1	0.000711847	-2.90062
NFIC	0.000773993	-3.61393
NIPAL4	0.000598466	-2.91959
NKIRAS1	0.000884381	-2.05639
NKIRAS2	0.000809292	-2.85967
NMNAT1	0.000808992	-4.03642
NR1D1	0.00059394	-2.64263
NSMCE4A	0.000986066	-2.65965
NSUN5P2	0.000837342	-3.0969
NUCB1	0.000158854	-3.6681
NUPL2	0.000742562	-1.9358
OSBPL5	0.00087416	-3.23638
P2RX5	0.000259092	-2.921
PACS1	0.000994264	-4.38553
PBXIP1.1	0.000538213	-4.9864
PCGF6	0.00017849	-2.26304
PCNX3	4.19574e-05	-3.50449
PFKL	0.000132403	-3.37866
PHF23	0.000277811	-3.75477
PIM1	0.000272571	-4.32504
PIM2	0.000213902	-4.49281
PITPNM1	0.000950698	-3.32631
PLEC	0.0004939	-3.43067
PLPPR2	0.000171078	-3.54861
PLSCR3	2.15071e-05	-2.78109
POM121C	0.00087041	-3.79398
PORCN	0.000540712	-2.88589
PPP1R12C	0.000207478	-3.28177
PPP1R15A	0.000315026	-3.94508
PPP1R16A	0.000781708	-3.41013
PPP6R1	0.000647852	-4.04144
PRKCSH	0.000292947	-4.04841
PRR13	0.000845362	-5.22099
PTMS	7.24123e-05	-3.53772
PTPN23	0.000421548	-2.75369
PTPN7.1	0.000141894	-3.09104
PVRIG	0.000611025	-3.5167
PXN	0.000134057	-4.4662
RAD51B	0.00010422	-1.80008
RALGDS	0.000237492	-3.00024
RASA1.1	0.000970669	-4.21488
RASGRP2	0.000487957	-3.91115
RASGRP4	0.000556221	-4.87616
RELA	6.58584e-05	-3.81321
RETREG2	3.35692e-05	-3.4201
RFXAP	0.000751594	-1.63593
RGP1	0.000500407	-3.2862
RGS14	0.000254832	-3.84894
RIC8A	0.000519178	-3.46924
RMDN2	0.000501239	-1.86186
RNASEH2B	0.000196579	-2.38898
RNF123	0.000161887	-3.15013
RNF40	0.000471856	-3.33702
RNF44	4.95707e-05	-3.87874
RNPEPL1	2.92751e-05	-3.80128
RPS24	0.000636702	-4.31912
RWDD4	0.000431537	-2.47027
RXRA	6.19059e-05	-3.93245
SAMD1	0.000444485	-3.37479
SAMD4B	0.000501352	-3.43317
SBNO2	0.000808598	-3.68672
SCAF1	2.67637e-05	-3.24931
SCARNA17	0.00041523	-4.99569
SEMA4B	0.000319341	-3.8316
SETD4.1	0.000478801	-2.23358
SF1	0.000479358	-4.20925
SGK3	0.000606242	-2.44466
SHISA5	0.00050988	-4.41597
SLC25A44	0.000399674	-3.81912
SLC25A5.1	0.000289037	-8.23715
SLC25A51.1	0.000138177	-2.80192
SLC2A1	2.12867e-05	-3.2671
SLC35A4	0.000144772	-3.42635
SLC48A1	3.11389e-05	-3.2716
SLC7A1	0.000892672	-2.41041
SLC7A5	5.77152e-05	-3.17375
SLC9A1	0.000388294	-3.52475
SNAPC1	0.000468738	-2.17711
SNHG22	6.17533e-05	-3.07215
SNX14	0.000955662	-2.56449
SPOCK2.2	0.00088435	-3.31095
SRF	0.000173042	-3.72197
SSR3	0.00071254	-2.69774
SSTR3	0.000467764	-2.72532
ST3GAL2	0.000339235	-3.55921
STAT5A	0.000131353	-3.98986
STK16.1	0.000140144	-3.1571
SUN2	0.00015527	-3.43111
SUZ12P1	0.000350434	-3.05589
SYVN1	0.000700504	-3.97441
SZT2	0.000501037	-2.89698
TAPBP	0.000788087	-4.74639
TAPBP.1	0.000325737	-4.91652
TAPBP.2	0.000325737	-4.91652
TAPBP.3	0.000392478	-4.92481
TAPBP.4	0.000536918	-4.88722
TBCA	0.000470756	-3.18723
TBKBP1	0.000854924	-3.30055
TCIRG1.2	0.000678224	-3.47053
TFAM	0.000147858	-3.21423
TFEB	0.000170602	-3.42029
TIAL1	8.7282e-05	-2.67476
TLE3	0.000227867	-4.63353
TM2D1	0.000234233	-2.74141
TMC8	0.000477408	-3.66049
TMEM121B	4.46648e-05	-3.38798
TMEM161A	0.000779349	-3.23055
TMEM185A	0.000177392	-2.68145
TMEM63B	0.000677816	-2.97847
TMEM88	0.000365226	-4.0794
TMEM8A	5.1871e-05	-4.1608
TNIP1	0.00054309	-4.08007
TNRC18	0.000295067	-3.26959
TNRC18.1	0.000193935	-3.56186
TRPM2.1	0.00041974	-3.29105
TTYH3	2.61893e-06	-3.81801
USB1	0.000346469	-3.99479
USF2	0.000167655	-4.41335
USF2.1	0.000952001	-4.68419
VPS9D1	8.3818e-05	-3.01357
WBP2	0.000535438	-4.26799
ZC2HC1A	0.000259821	-2.38868
ZC3H4	0.000265773	-3.75529
ZHX2	0.000353848	-3.15814
ZIC5	0.000244464	-3.49431
ZNF20	0.000729494	-2.11113
ZNF202.1	2.37343e-05	-2.57379
ZNF219	0.000288738	-3.49477
ZNF322.1	0.000652568	-1.96807
ZNF562	0.00029773	-2.2107
ZNF598	0.00038177	-3.42707
ZNF687	0.000422408	-3.20461
ZNF787	0.000879664	-3.82111
ZNF821	0.000355712	-2.28155
ZNF821.1	0.000453822	-3.26811
ZXDC.1	0.0006738	-3.34173
ZYX	0.000368429	-4.35728

## Sheet: ALL Sepsis Good v Poor
Gene	P-value	FC
H6PD	0.000758376	-1.6696
RPL11	0.000111241	-1.82122
HCRTR1	0.000259308	-1.55005
ZC3H12A	0.000376213	-1.67948
NDUFS5	0.000847277	-1.56383
BTBD19	0.000649364	-1.67907
AKR1A1	0.000895116	-1.51488
BTF3L4	0.000309528	-1.45829
LOC100507634	0.000556345	-1.66646
ATG4C	6.56271e-05	-1.23504
PPIAL4E	0.000524161	-1.41061
LOC107985108	0.000439621	-1.2519
MRPS21	0.000541731	-1.3837
ZNF687	0.000263969	-1.65129
ZBTB7B	0.000315551	-1.77673
SEMA4A	0.000806553	-1.76657
SLC25A44	0.000105355	-1.83206
DUSP12	0.0004436	-1.37249
CACYBP	0.000545783	-1.48792
CACNA1E	0.000768228	-1.52939
LAMC1	0.000167236	-1.46724
SNRPE	0.00035375	-1.50577
COG2	0.000685437	-1.28799
SCCPDH	0.000439903	-1.3479
PGBD2	0.00036232	-1.32987
MRPL20	0.000106445	-1.59898
RPL22	0.000170599	-1.61853
UQCRHL	0.000968562	-1.59816
SNRNP40	0.000852639	-1.34297
MEAF6	3.26051e-05	-1.39235
TRIT1	2.02721e-05	-1.30803
EIF2B3	0.000614354	-1.37912
DOCK7	0.000194253	-1.21102
ZNF644	0.000317035	-1.36218
EVI5	0.000325489	-1.30103
DRAM2	0.000371104	-1.35703
APH1A	0.000500931	-1.60771
CDC42SE1	0.000425844	-1.91441
APOA2	0.000434517	-1.56872
KIF21B	0.000370063	-1.71128
TMEM206	0.00036513	-1.3894
ANGEL2	0.000286679	-1.35157
CCSAP	0.000614018	-1.62239
TOMM20	0.00013919	-1.47967
SH3BP5L	0.000509734	-1.58042
NENF	0.000980704	-1.39801
LOC729737	7.16672e-05	-2.32723
LOC105376805	0.000252686	-1.46709
TRIT1	0.000861187	-1.23124
S100A10	0.000333906	-1.61522
PTPN7	0.000938463	-1.61055
SLC35E2	0.000440005	-1.65872
KRTCAP2	0.000810615	-1.58601
RPS7	0.000405614	-1.53847
IAH1	0.000915334	-1.42626
TAF1B	0.000980161	-1.27874
FOSL2	0.0001048	-1.76275
MSH2	0.000473236	-1.32323
VRK2	0.000611694	-1.36852
MDH1	0.000494535	-1.27591
PNO1	0.000633309	-1.31895
MPHOSPH10	0.00051477	-1.41254
DYSF	0.000888704	-2.08298
DGUOK	0.000673823	-1.42274
VAMP8	0.000298299	-1.58474
MRPL35	0.000101859	-1.35612
RPL31	3.96021e-05	-1.53589
MTX2	0.000317658	-1.25526
RBM45	0.000320247	-1.23162
WDR75	0.000435718	-1.2357
NIF3L1	0.000209088	-1.30964
FASTKD2	0.000760143	-1.20053
CTDSP1	0.000331377	-1.66571
WNT6	0.000632122	-1.72996
RETREG2	9.98673e-05	-1.69567
STK16	0.000641622	-1.5945
COPS8	0.00068513	-1.30857
ERFE	0.000385115	-1.68467
SRSF7	4.58148e-05	-1.47612
MAP4K3	0.000125779	-1.2519
LRPPRC	0.000707659	-1.31913
MCEE	0.000907688	-1.31409
TPRKB	0.000862609	-1.37603
GCFC2	0.000468617	-1.22055
ADRA2B	0.000866384	-1.6172
ACTR1B	0.000295289	-1.69569
NIFK	0.000280579	-1.34438
METTL5	0.000249325	-1.43637
OLA1	0.000582115	-1.43136
METTL21A	8.28983e-05	-1.46545
PID1	0.000971694	-1.39855
ILKAP	0.000405294	-1.38576
MTERF4	0.000203299	-1.35907
TIA1	0.000319469	-1.16265
TSN	0.000711416	-1.65549
CERS6-AS1	3.48959e-05	-1.27918
MTERF4	0.000499026	-1.40814
TIA1	0.000877538	-1.37651
MRPL30	0.000232239	-1.48553
JAGN1	0.00055224	-1.30468
LSM3	0.000875697	-1.48307
RPL15	0.000547698	-1.52146
CNOT10	0.000644022	-1.41288
DHX30	6.62583e-05	-1.4207
TCTA	0.000654884	-1.6499
SPCS1	0.000608513	-1.50738
GTPBP8	0.000365125	-1.29417
POGLUT1	0.000562054	-1.28549
TIMMDC1	0.000368135	-1.35262
CD86	2.77893e-05	-1.37661
UMPS	0.000229202	-1.33607
MRPS22	0.00034542	-1.35168
EIF2A	0.000503954	-1.38056
B3GNT5	0.000103566	-1.62247
NCBP2-AS2	5.44308e-05	-1.38166
RPL35A	8.66039e-05	-1.64489
SHISA5	0.000202383	-1.91818
USP19	0.000693779	-1.64621
GLT8D1	6.92395e-05	-1.32013
EIF4E3	0.000220854	-1.95272
RPL24	0.000229301	-1.81348
SNX4	0.000874131	-1.40292
KLF15	0.000957082	-1.74877
ASTE1	6.97571e-05	-1.32203
MRPL3	0.00025912	-1.33536
SERP1	0.0008925	-1.49763
SLC33A1	0.000315178	-1.27642
SSR3	9.10294e-05	-1.37958
DNAJC19	0.000276536	-1.35838
MCCC1	5.51363e-05	-1.29351
PARL	8.05597e-05	-1.29224
BCL6	0.000364236	-2.15637
ARIH2	0.000148956	-1.46352
PRKCD	0.000389649	-2.40583
PPM1L	0.000586582	-1.29151
NCBP2-AS2	5.69909e-05	-1.37944
SEC13	0.000561275	-1.56023
DNAJC19	0.000126688	-1.44581
HACL1	0.000610079	-1.30829
RAB43	0.000312734	-1.78477
SH3BP2	0.000277607	-1.72286
OCIAD1	0.000473049	-1.48401
PAICS	0.000896445	-1.32498
COPS4	0.000846388	-1.3293
RPL34	0.000596911	-1.69321
MCUB	0.000277622	-1.45722
EXOSC9	0.000447815	-1.31449
MGST2	0.000964869	-1.3914
CTBP1	0.000177846	-1.63089
LCORL	0.000665124	-1.293
RPL9	0.000613951	-1.6426
GRSF1	0.000129279	-1.44757
NUP54	0.000680468	-1.32698
HELQ	0.000198284	-1.24098
IL15	0.00071417	-1.18344
UFSP2	0.000304702	-1.29041
NDUFS6	0.000253888	-1.49016
C5orf22	0.000615656	-1.29211
SKIV2L2	0.000620252	-1.3495
TRAPPC13	0.000707684	-1.26741
PTCD2	0.000416613	-1.20713
BTF3	0.000462166	-1.58171
NSA2	0.000209707	-1.52104
FER	0.000156535	-1.24434
SLC25A46	0.000784108	-1.3774
EPB41L4A-AS1	0.00043074	-1.4248
SNX2	0.00096832	-1.54402
LYRM7	0.000959097	-1.32709
TXNDC15	1.03e-05	-1.44028
FAM53C	0.000256627	-1.60075
MRPL22	0.000836962	-1.41081
RGS14	0.000190202	-1.77532
PAIP1	0.000665471	-1.40943
DHX29	0.000202105	-1.30369
DIMT1	0.000682055	-1.3152
RPS23	0.000151116	-1.56856
RIOK2	0.000333236	-1.26952
ATG12	0.000688264	-1.39851
HINT1	0.000362446	-1.46497
FCHSD1	0.000686076	-1.63903
BOD1	0.000314517	-1.37709
RNF44	0.000147912	-1.79677
PRR7-AS1	0.00061961	-1.4963
EPB41L4A-AS1	0.000893809	-1.46444
TICAM2	0.000397953	-1.53144
MAML1	0.00042753	-1.88386
SDHAP3	0.000237309	-1.41583
FASTKD3	0.000723201	-1.36533
RAD1	0.000771163	-1.34644
RPL37	0.000163988	-2.35823
PRR7-AS1	0.000338098	-1.59578
LY86	4.53669e-05	-1.26923
PAK1IP1	0.000428399	-1.25152
HCG11	0.000262427	-1.39595
PRRC2A	0.000382288	-1.56824
HLA-DPB1	0.000129057	-1.5216
HLA-DPB2	0.000634833	-1.34203
KIFC1	1.61844e-05	-1.67352
SNRPC	0.000574685	-1.42498
FAM135A	0.000680318	-1.26696
ORC3	0.000701597	-1.30254
OSTM1-AS1	0.000529648	-1.48734
RPF2	0.000253906	-1.24456
NT5DC1	0.000444358	-1.27488
RPS12	8.38083e-05	-2.00232
PEX3	0.000638194	-1.28469
TFEB	0.00024059	-1.68181
CCND3	0.000909313	-1.74606
MRPL14	0.000777003	-1.40698
RARS2	9.03748e-05	-1.38617
ZBTB24	0.000366266	-1.36512
ZUFSP	0.000781529	-1.26474
RMND1	0.000910234	-1.29349
LINC02538	0.000375036	-1.4341
PHF10	0.000364784	-1.3858
PDCD2	0.000655556	-1.48862
TNF	0.000783414	-1.51308
HCG11	9.38369e-05	-1.35509
CRYBG1	0.000818598	-1.64401
RPF2	0.000278804	-1.28175
MARCKS	9.71572e-05	-2.17463
ECI2	0.000449319	-1.31826
UBE3D	0.000868157	-1.28255
SNX14	0.000596744	-1.36355
HLA-DMB	0.000189062	-1.42201
HLA-DMA	0.000609925	-1.41016
RPS10	0.000226741	-1.72092
OARD1	0.000422185	-1.4107
AP5Z1	0.0006819	-1.64496
NUPL2	0.000371229	-1.24111
MRPL32	0.000276229	-1.35373
PPIA	0.000684296	-1.54916
CCT6A	0.000494158	-1.47515
CCT6P1	0.000238675	-1.39106
CD36	0.000686063	-1.39246
VPS50	0.000151734	-1.25085
SLC12A9	0.000219442	-1.72123
PMPCB	0.000198967	-1.45465
BCAP29	0.000707051	-1.35602
GIMAP2	0.000899534	-1.59236
TNRC18	0.000302101	-1.65492
FERD3L	0.000197588	-1.71257
CPVL	4.4598e-06	-1.43964
LSM5	0.000632109	-1.33773
RP9	0.000534062	-1.37318
GRB10	0.000656218	-1.57679
CHCHD2	0.000806385	-1.67884
BAIAP2L1	4.72949e-05	-1.42025
GIGYF1	0.000859475	-1.64462
EPHB4	2.47992e-05	-1.6405
IMPDH1	0.000669265	-1.76699
PHF14	0.000959451	-1.35699
BZW2	0.000845633	-1.31695
RPL21	6.9125e-06	-2.12253
BCAP29	0.000435206	-1.38686
GIMAP7	0.00047594	-1.55088
GNA12	0.00066736	-1.35707
LSM5	0.000467571	-1.26526
FGL2	3.06854e-05	-1.89534
METTL2B	0.000303187	-1.35412
ADAP1	0.00021358	-1.66811
PSMA2	0.000392749	-1.49191
LRCH4	0.000990176	-1.77063
AGPAT5	3.64159e-05	-1.24421
BLK	3.25582e-05	-1.49863
DPY19L4	7.7477e-05	-1.21159
WISP1	0.000991616	-1.59801
GRINA	0.000820707	-1.94482
PPP1R16A	0.000785795	-1.66663
PPP2CB	0.000227312	-1.4241
LACTB2	0.000888821	-1.24186
C8orf59	0.000101006	-1.36962
MTERF3	0.000935925	-1.23549
RPL30	0.000642128	-1.73206
COX6C	0.000643924	-1.40755
ZNF706	0.000447841	-1.46837
EIF3E	0.000133212	-1.40962
NUDCD1	0.000634513	-1.2809
MRPL13	0.00064145	-1.29335
PLEC	8.06911e-05	-1.70264
PARP10	0.000239185	-1.66427
UBXN8	0.000742441	-1.25151
ZC2HC1A	7.53913e-05	-1.01637
NACAP1	0.000270356	-1.46565
RRS1	0.000636188	-1.34257
MRPS28	0.000546324	-1.37889
RGS3	0.000637454	-1.56562
RXRA	0.000997282	-1.78584
MIR4669	2.62272e-06	-2.17472
RPS6	0.000277917	-1.58696
FAM219A	3.27882e-05	-1.72127
FAM214B	0.000114495	-1.71479
FRG1JP	0.000586009	-1.43905
TEX10	0.000875797	-1.33008
PSMB7	0.000531192	-1.44286
RPL35	0.000632234	-1.80741
MAPKAP1	0.000868879	-1.45575
RPL12	9.36916e-05	-1.69224
MIR3689D1	0.00037074	-1.74085
MIR3689D2	0.000100503	-1.73083
ABCA2	5.90297e-05	-1.6661
UBAP1	0.000464194	-2.05158
TUBBP5	0.000884636	-1.53274
LCN6	0.000815223	-1.53921
ZNF322	0.000118289	-1.22548
GPR82	0.000601034	-1.20821
TBC1D25	0.00054736	-1.64133
NBDY	0.000827814	-1.28711
FOXO4	3.18083e-05	-1.70362
APOOL	4.32971e-05	-1.3109
SLC25A5	0.000574209	-1.60041
MCTS1	0.000826253	-1.36806
TRAPPC2	0.000307363	-1.48587
RPL9	6.78167e-05	-2.14446
TFE3	8.88321e-05	-1.70908
KDM5C	0.000729199	-1.70139
ABCB7	0.000440913	-1.32211
CH17-340M24.3	0.00059031	-1.30359
ARMCX5	0.000841506	-1.28938
SLC25A5	0.000176178	-2.14845
FGF13	0.000698152	-1.80067
PFKFB3	0.000672789	-1.75252
RPP38	0.000936727	-1.4202
DDX50	0.00066395	-1.33037
ANAPC16	0.000430581	-1.56325
RPS24	2.33929e-05	-1.71332
RPP30	0.000320557	-1.27225
UBTD1	0.000246591	-1.69224
GLRX3	0.000343777	-1.35085
ATOH7	0.000915896	-1.38108
PPA1	0.000467733	-1.44186
PCGF6	0.000914035	-1.33674
RGS10	0.000516828	-1.50258
TIAL1	8.43741e-05	-1.41073
NSMCE4A	0.000581384	-1.37093
MIR4297	0.000478853	-1.85448
LINC00863	7.15815e-05	-1.42214
FAM24B	0.000932058	-1.22236
RIC8A	0.000609152	-1.67789
AKIP1	0.000463855	-1.41832
GTF2H1	0.000881482	-1.38983
EIF3M	0.000180547	-1.56295
CD82	0.000428078	-1.83307
MARK2	0.00075034	-1.80813
GPR137	0.000507325	-1.68142
PAAF1	4.7222e-05	-1.3591
TMEM126A	0.000840285	-1.27015
EED	0.00013543	-1.29012
HIKESHI	0.000269161	-1.3486
CEP57	0.000974692	-1.40383
AASDHPPT	0.000851651	-1.37399
CUL5	0.000647092	-1.30819
NKAPD1	6.2977e-05	-1.36256
TMEM9B	0.000566191	-1.54214
CYP2R1	0.000290545	-1.27405
FANCF	0.0005116	-1.35435
CSTF3	0.000777268	-1.33501
EHD1	0.00018839	-1.7311
MAP3K11	0.000390998	-1.7316
RELA	0.000814558	-1.77043
THAP12	0.000334077	-1.47382
CCDC90B	0.000240023	-1.40154
RPS25	0.000185197	-1.94957
MSANTD2	0.000890572	-1.32558
TMEM218	8.93599e-05	-1.39957
HIKESHI	0.000361106	-1.36635
TMEM123	0.000497571	-1.51547
RPS13	6.75338e-05	-2.0798
MRPL11	0.000811573	-1.27855
MRPL21	0.000828642	-1.41737
PTPMT1	0.000787974	-1.3608
NDUFS3	0.000800261	-1.55534
PSMA1	0.000281495	-1.49137
RPS13	5.33294e-05	-1.97133
COX8A	0.000623386	-1.68297
STRAP	0.000501236	-1.39748
ETFRF1	0.00062885	-1.26944
MED21	0.0006586	-1.44403
KRT86	5.767e-05	-1.55962
PFDN5	0.000302995	-1.69296
TMEM5	0.000497347	-1.35283
CCT2	0.000599544	-1.46281
C12orf45	0.000147105	-1.32543
ULK1	0.000559963	-1.67247
CD27-AS1	0.000712704	-1.55013
HDAC7	0.000523906	-1.65355
NCKAP5L	0.000627873	-1.59338
KRT85	0.000369308	-1.53752
NDUFA12	0.000292642	-1.49784
ARL1	0.000120716	-1.38267
GPN3	0.000418705	-1.34477
PPP1CC	0.000822233	-1.59511
MAPKAPK5-AS1	0.000296873	-1.39583
PXN	3.54192e-05	-1.94035
SMIM10L1	0.00072742	-1.48928
NAP1L1	2.73536e-05	-1.64866
TMPO	0.000422063	-1.54646
GTF3A	0.000217314	-1.47031
RFXAP	0.000569604	-1.15399
EXOSC8	0.000285186	-1.29106
UFM1	0.000770592	-1.36589
GPALPP1	0.000129538	-1.38405
RNASEH2B	0.000106259	-1.3197
SUGT1	4.06773e-05	-1.40463
TDRD3	0.000925416	-1.29359
PIBF1	0.000221608	-1.28552
BTF3P11	0.000721541	-1.27041
AMER2	4.4703e-05	-1.57679
ALG5	0.000949299	-1.25054
MRPS31	0.000287901	-1.43377
NUFIP1	0.00074025	-1.21743
SUCLA2	0.000204339	-1.32739
POU4F1	0.000136022	-1.60285
ZIC5	0.000132922	-1.70001
BIVM	2.1201e-06	-1.27255
N4BP2L1	0.000220131	-1.28644
NGDN	0.00085561	-1.44329
PRPF39	0.000472325	-1.27941
KLHDC2	0.000224544	-1.34362
ZBTB1	0.00053703	-1.49968
ZC3H14	0.00045454	-1.40369
OSGEP	0.000338067	-1.41579
RPL36AL	0.000488309	-1.7932
TIMM9	0.000218717	-1.23411
IRF2BPL	0.000640769	-1.61439
BTBD6	0.000382216	-1.54761
LTB4R	0.000582125	-1.77174
SLC38A6	0.000645356	-1.27448
APOPT1	0.000483209	-1.42943
DTD2	0.000825321	-1.4985
CHEK2P2	0.000406414	-1.26059
TUBGCP5	0.000430291	-1.25171
SKOR1	0.000218256	-1.60572
RPLP1	9.67084e-05	-1.66279
ST20-AS1	0.000480551	-1.77179
PDE8A	0.000615806	-1.29707
MRPS11	0.000814966	-1.43714
SEMA4B	0.000137423	-1.79056
FURIN	0.000219699	-1.86948
TLE3	0.000364095	-1.96323
MIR4513	0.000368577	-1.62773
COX5A	0.000554379	-1.70554
FBXO22-AS1	0.000282889	-1.45908
LINGO1	0.000702977	-1.54135
WDR61	0.000269966	-1.3582
RPL9	5.68241e-05	-2.1377
C15orf40	0.000971475	-1.37588
MRPL46	0.000305109	-1.27747
RAB11A	0.000308535	-1.48139
EHD4	0.000288385	-1.47764
RPL4	6.06632e-05	-2.13482
HMG20A	0.000303249	-1.3117
IREB2	0.000949822	-1.43111
PLEKHO2	2.42969e-05	-2.0105
MIR4717	0.000379739	-1.71085
CCNF	0.000711134	-1.56146
MMP25	7.23076e-05	-1.95302
INO80E	8.41345e-05	-1.58135
RNF40	0.000379983	-1.6575
PHKB	0.000335013	-1.3929
ADGRG3	0.000841561	-2.1679
HAS3	0.000365269	-1.62673
AXIN1	0.000235811	-1.65347
RPS15A	0.000216127	-1.89194
NDUFAB1	0.00042293	-1.51772
NSMCE1	0.000311165	-1.4107
FBXL19-AS1	0.000695064	-1.43183
EXOSC6	0.000998389	-1.57097
ST3GAL2	0.000238274	-1.74192
MIR1910	0.000289133	-1.83981
APRT	0.000764823	-1.49227
VPS9D1	3.42124e-05	-1.61848
LOC554206	0.000817234	-1.43265
RPL13	0.000456844	-1.67967
FBXL19-AS1	9.48319e-05	-1.43116
FAM96B	0.000965423	-1.48068
KIAA0895L	0.000429314	-1.55269
KIF1C	0.000259619	-1.66731
RPAIN	0.000581681	-1.36522
RPL29P2	0.000442589	-1.40478
DRG2	0.000220485	-1.42184
LASP1	0.000402753	-1.88413
RPL19	0.000532246	-1.94536
RAPGEFL1	0.000142298	-1.50294
RARA	0.000947826	-1.8389
STAT5A	0.000395768	-1.80077
RPL27	0.000528274	-2.01605
FMNL1	0.000558824	-1.99041
NFE2L1	0.000311072	-1.57995
ATP5G1	0.00068818	-1.43419
UTP18	0.000355009	-1.34265
NOG	0.000539745	-1.16168
NOL11	0.00029726	-1.22154
RPL38	0.00071331	-1.89401
KCTD2	0.000375994	-1.65817
UBALD2	1.11714e-05	-2.16392
MIR4730	0.000111488	-1.67538
HGS	0.000700747	-1.67115
SLC16A3	1.12669e-05	-1.89238
NUP88	0.00091938	-1.33769
CLEC10A	0.000296702	-1.37953
SAT2	0.000458178	-1.32695
RPL26	0.000162234	-1.9489
PIK3R5	0.000219288	-1.87841
SCO1	0.000549951	-1.28027
ZSWIM7	8.18385e-05	-1.35656
MIR4732	0.000641738	-1.92669
FLOT2	2.96477e-05	-2.09266
UTP6	0.00017547	-1.36521
AMZ2P1	0.000493089	-1.2837
LINC00511	0.000500181	-1.5052
TTYH2	7.67692e-05	-1.38581
AATK	0.000687667	-1.68007
RPAIN	0.000292838	-1.36154
MRPL45P2	0.00039487	-1.31408
COX11	0.000661681	-1.28038
ELP2	1.93301e-05	-1.24346
CTDP1	0.000683166	-1.5631
FAM210A	0.000320152	-1.29919
LOXHD1	0.000914324	-1.47422
ELP2	3.11638e-05	-1.27373
PMAIP1	0.000907784	-1.34793
PSMG2	0.000215146	-1.37126
MIDN	0.000302946	-1.76195
RPS15	0.000589741	-1.78787
ZNF555	0.000330872	-1.33352
RPL36	0.000685633	-1.80846
RPS28	0.000171652	-1.92326
PLPPR2	0.000583725	-1.73418
NACC1	0.00098658	-1.73021
UBA52	0.000433746	-2.12057
GATAD2A	4.86823e-05	-1.70617
PDCD2L	0.00012711	-1.29464
SCN1B	0.000268006	-1.53849
COX6B1	0.00075218	-1.81218
EIF3K	0.000821355	-1.68203
CIC	9.35304e-05	-1.68795
BCL3	0.000422819	-1.87399
SCAF1	0.000128384	-1.65461
RPS5	0.0004812	-1.74191
SBNO2	4.34639e-05	-1.76361
CSNK1G2-AS1	0.000644689	-1.51357
MLLT1	0.000155613	-1.8587
ZNF561	0.000167986	-1.35734
ZNF562	0.000219269	-1.31254
ZNF490	0.00012957	-1.43469
LPAR2	0.000307842	-1.72686
GMIP	5.22273e-05	-1.91714
ZNF675	0.000541172	-1.39388
RASGRP4	0.000994133	-2.00369
AKT2	0.000367469	-1.64371
ZC3H4	0.000146885	-1.77728
RPL18	0.000768748	-1.59475
PPP1R12C	0.000313556	-1.64682
ZNF787	0.000292228	-1.75367
ZNF552	0.000852595	-1.79778
SIGLEC16	0.00043244	-1.62904
TRAPPC2B	0.000937974	-1.39798
PTPRS	0.000553206	-1.33265
KXD1	0.000622726	-1.91325
ZNF808	0.000253788	-1.43371
SIRPA	0.000588551	-2.08856
CRLS1	0.000589376	-1.32536
FRG1BP	0.00028569	-1.51688
EIF6	0.0004782	-2.00732
SNX5	0.000324657	-1.47115
SOD1	0.000964902	-1.6366
TRPM2	0.00010148	-1.64261
MRPL39	0.000860088	-1.33481
KCNE1	0.000672345	-1.53124
TRPM2	0.000117119	-1.66539
IFNGR2	7.5045e-05	-1.60301
PIGP	0.000452023	-1.26146
CRYZL1	0.000957835	-1.31406
MRPL40	0.000288244	-1.34593
LIMK2	1.75733e-05	-1.97592
GGA1	0.000396624	-1.56916
TTC38	0.000777283	-1.49681
TMEM121B	1.04934e-05	-1.71418
NDUFA6	0.000302311	-1.55704
KIAA0930	0.000468334	-1.73624
ADSL	0.000423283	-1.40594
SUN2	0.000143465	-1.68778
HLA-DMB	0.000221584	-1.40357
HLA-DMA	0.000479852	-1.42787
HLA-DPB1	0.000140716	-1.49375
HLA-DPB2	0.0004464	-1.34008
TRIM26	0.000838173	-1.58954
HLA-DPB2	0.000177637	-1.35505
HLA-DMB	0.000299747	-1.40393
HLA-DMA	0.000494826	-1.42253
HLA-DPB1	0.000137527	-1.49321
HLA-DQB1	0.000496556	-1.39791
HLA-DMB	0.000258713	-1.40263
HLA-DMA	0.000457151	-1.42594
TRIM26	0.000945422	-1.58992
HLA-DRB4	0.00017236	-1.37154
HLA-DMB	0.000221681	-1.40332
HLA-DMA	0.000494826	-1.42253
HLA-DPB1	0.000145443	-1.49365
HLA-DPB2	0.000181728	-1.3649
HLA-DPB2	0.000706405	-1.25292
HLA-DPB1	0.000140716	-1.49375
HLA-DMB	0.000244498	-1.40354
HLA-DMA	0.000494826	-1.42253
KIFC1	1.61844e-05	-1.67352
TRIM26	0.000638176	-1.60029
HLA-DPB1	0.000121131	-1.49406
HLA-DPB2	0.000181728	-1.3649
HLA-DMB	0.000252009	-1.40303
HLA-DMA	0.000494826	-1.42253
HLA-DPB1	0.000137527	-1.49321
HLA-DPB2	0.000286871	-1.35927
KIFC1	1.61844e-05	-1.67352
HLA-DRB1	8.46235e-05	-1.71936
HLA-DQB1	0.000924679	-1.40438
HLA-DMB	0.000200214	-1.40504
HLA-DMA	0.000494826	-1.42253
LOC283788	0.000812889	-1.42929
FRG1CP	0.0003846	-1.4276
